# Supplementary material
Source: PubMed Central journal article supplement (PMC4834880)
Supplement: supp_ddu512_ddu512supp.pdf [file supp_ddu512_ddu512supp.pdf]

## Supplementary Figure 1

**GWAS**  
[bladder cancer] 539  
[non-cancer control] 5,594

**Genotyping:**  
OmniExpress Exome

**SNP Quality control**  
: Call rate  $\geq 0.99$   
HWE  $\geq 1 \times 10^{-6}$ , MAF  $\geq 0.01$

**Replication**  
[bladder cancer] 592  
[non-cancer control] 6,964

**Genotyping: Invader assay**  
/OmniExpress Exome

**SNP Quality control**  
: Call rate  $\geq 0.99$   
HWE  $\geq 1 \times 10^{-6}$ , MAF  $\geq 0.01$

554,389 SNPs

$P$  value  $< 5 \times 10^{-5}$

82 SNPs

Exclude SNPs showing  
 $r^2 > 0.8$  in the same region

64(59) SNPs

$P$  value  $< 0.05/59$

1 SNPs

## Supplementary Figure 1

Summary of study design and results.

# Supplementary Figure 2

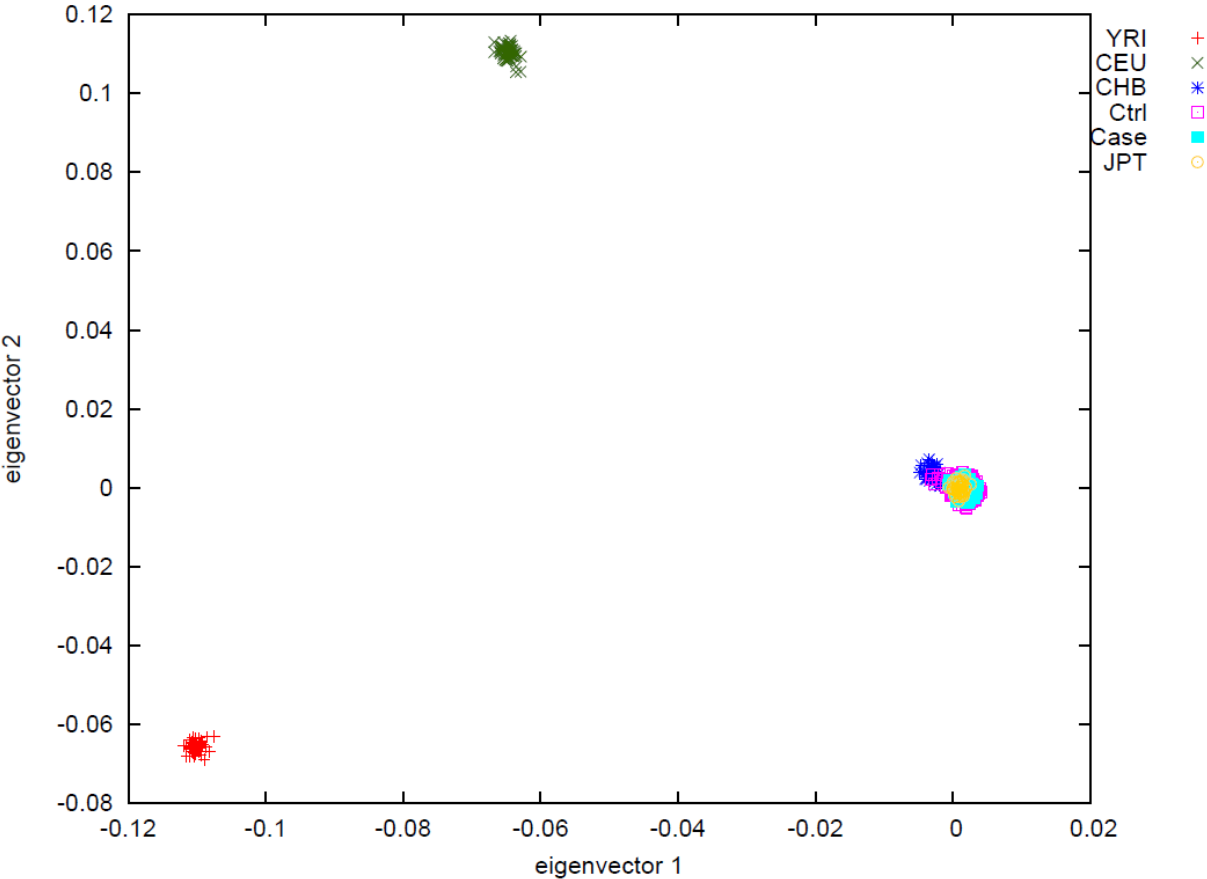

**Supplementary Figure 2** Principal Component Analysis (PCA) plots showing the distribution of case and control used in the GWAS. Case and control samples of this study with four reference populations from the HapMap database which include Europeans (represented by Caucasian from UTAH, CEU), Africans (represented by Yoruba from Ibadan, YRI) and East Asians (represented by Japanese from Tokyo, JPT, and Han Chinese from Beijing, CHB). All samples used in GWAS were of Asian ancestry.

### Supplementary Figure 3

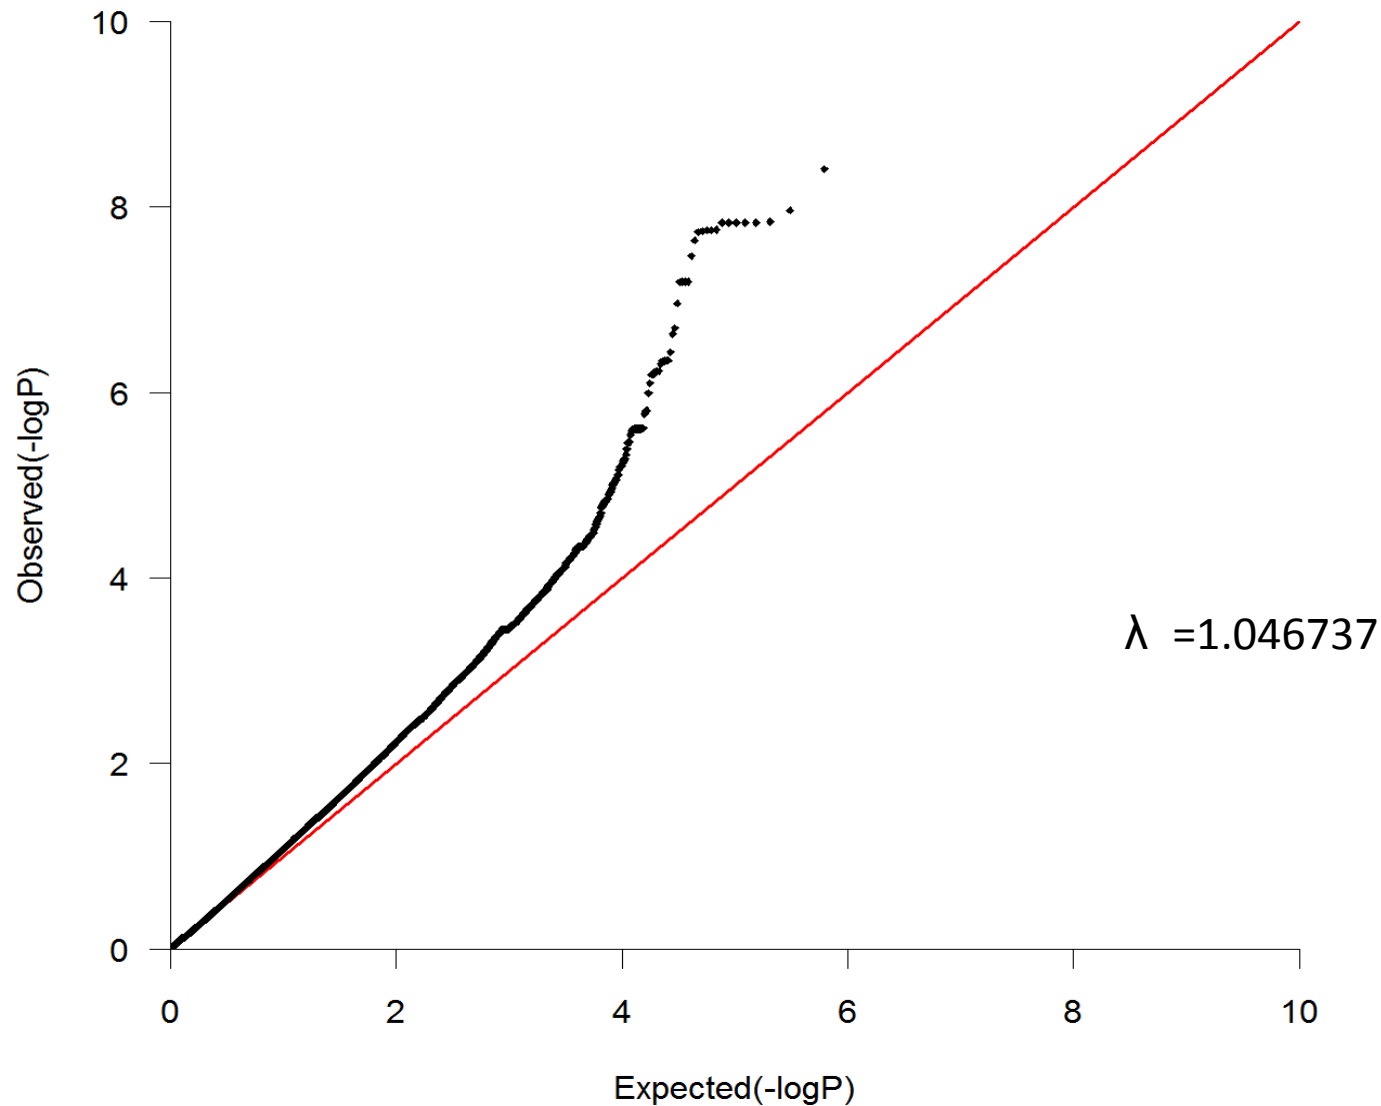

**Supplementary Figure 3** Quantile-quantile plots for test statistics (Cochran-Armitage trend test). Black dots are the uncorrected test statistics ( $\lambda = 1.046737$ ). SNPs of MAF=0 or HWE  $< 10^{-6}$  in controls were excluded from analysis.

Supplementary Table 1. Characteristics of study population.

| Stage                                  | Platform                                     | Number of samples | Female (%) | Age (mean +/- SD) |
|----------------------------------------|----------------------------------------------|-------------------|------------|-------------------|
| GWAS (Japanese)                        |                                              |                   |            |                   |
| Cases <sup>a</sup>                     | Illumina Ominiexpress exome                  | 539               | 19.40%     | 68.62 +/- 11.10   |
| Controls <sup>b,c</sup>                | Illumina Ominiexpress + Illumina Human Exome | 5594              | 39.20%     | 56.92 +/- 14.10   |
| Replication 1 (Japanese)               |                                              |                   |            |                   |
| Cases <sup>a</sup>                     | Invader assay                                | 592               | 17.30%     | 70.16 +/- 10.99   |
| Controls <sup>b,d</sup>                | Illumina Ominiexpress exome                  | 6964              | 47.00%     | 44.47 +/- 18.17   |
| Replication 2 <sup>e</sup> (Europeans) |                                              |                   |            |                   |
| Cases                                  | Illumina Human 1M-Duo/ Illumina              | 3508              | 15.42%     | 66.95 +/- 7.87    |
| Controls                               | Human 610 Quad                               | 5101              | 17.35%     | 65.06 +/- 8.61    |

<sup>a</sup> Bladder cancer samples were collected from 11 hospitals: Iwate Medical University, Okayama University, Kochi Medical School, Kyoto Prefectural University of Medicine, Kanazawa University, Yamagata University, University of Tsukuba, Nagoya City University, Gifu University, Kagoshima University, and Ehime University. <sup>b</sup>Control samples were obtained from Biobank Japan Project. Samples with previous history of cancer were excluded from analysis. <sup>c</sup> Control samples include healthy volunteers (n=1,919) and patients with cerebral aneurysm, chronic obstructive pulmonary disease, glaucoma. <sup>d</sup>Control samples for replication 1 include patients with nephrolithiasis, epilepsy, atopic dermatitis, nephrotic syndrome, and Grave's disease. <sup>e</sup>NCI-GWAS study in individuals with bladder cancer and controls of European ancestry (Rothman et al, Nat Genet, 2010).

Supplementary Table 2. Summary of GWAS

| SNP        | chr | Position  | gene         | relativeloc | case |     |     | control |      |      | Ptrend                  | allele |   |
|------------|-----|-----------|--------------|-------------|------|-----|-----|---------|------|------|-------------------------|--------|---|
|            |     |           |              |             | 11   | 12  | 22  | 11      | 12   | 22   |                         | 1      | 2 |
| rs6933607  | 6   | 33743997  | LEMD2        | 0           | 1    | 79  | 451 | 96      | 1338 | 4147 | 1.76 x 10 <sup>-8</sup> | T      | C |
| rs1075379  | 6   | 33737800  | LEMD2        | 1190        | 451  | 79  | 1   | 4146    | 1337 | 96   | 1.79 x 10 <sup>-8</sup> | T      | C |
| rs943466   | 6   | 33731787  | LEMD2        | 7203        | 1    | 83  | 447 | 97      | 1367 | 4110 | 3.39 x 10 <sup>-8</sup> | A      | G |
| rs3828783  | 6   | 33767727  | MLN          | 0           | 1    | 75  | 455 | 83      | 1264 | 4231 | 1.10 x 10 <sup>-7</sup> | T      | C |
| rs942636   | 6   | 33651129  | ITPR3        | 0           | 1    | 65  | 465 | 59      | 1162 | 4357 | 2.02 x 10 <sup>-7</sup> | A      | G |
| rs11759011 | 6   | 33650812  | ITPR3        | 0           | 1    | 64  | 466 | 56      | 1151 | 4374 | 2.35 x 10 <sup>-7</sup> | A      | G |
| rs1416476  | 1   | 187500338 | FDRSP1       | -31851      | 3    | 34  | 494 | 1       | 177  | 5401 | 4.96 x 10 <sup>-7</sup> | T      | C |
| rs2092449  | 1   | 210585575 | HHAT         | 0           | 25   | 190 | 316 | 168     | 1513 | 3895 | 7.94 x 10 <sup>-7</sup> | T      | C |
| rs2296329  | 6   | 33650743  | ITPR3        | 0           | 405  | 119 | 7   | 3721    | 1683 | 176  | 2.87 x 10 <sup>-6</sup> | A      | G |
| rs1048943  | 15  | 75012985  | CYP1A1       | 0           | 370  | 144 | 17  | 3321    | 1956 | 304  | 4.09 x 10 <sup>-6</sup> | A      | G |
| rs961266   | 15  | 54471130  | UNC13C       | 0           | 406  | 118 | 7   | 4683    | 859  | 34   | 4.67 x 10 <sup>-6</sup> | A      | G |
| rs334446   | 18  | 69059944  | LOC100505776 | 127256      | 312  | 174 | 44  | 3690    | 1674 | 215  | 5.53 x 10 <sup>-6</sup> | T      | C |
| rs16972486 | 15  | 75066008  | CSK          | -8417       | 10   | 138 | 383 | 259     | 1801 | 3519 | 5.80 x 10 <sup>-6</sup> | A      | G |
| rs11543198 | 15  | 74912328  | CLK3         | 0           | 16   | 140 | 375 | 283     | 1913 | 3385 | 6.22 x 10 <sup>-6</sup> | A      | G |
| rs8041357  | 15  | 74869438  | ARID3B       | 0           | 375  | 140 | 16  | 3386    | 1912 | 283  | 6.41 x 10 <sup>-6</sup> | A      | G |
| rs1763382  | 10  | 29308480  | RPL21P93     | -120027     | 91   | 265 | 175 | 1354    | 2795 | 1432 | 6.89 x 10 <sup>-6</sup> | T      | G |
| rs2257127  | 14  | 69060068  | RAD51B       | 0           | 436  | 86  | 9   | 4043    | 1420 | 118  | 7.73 x 10 <sup>-6</sup> | A      | G |
| rs7081804  | 10  | 29312885  | RPL21P93     | -124432     | 126  | 276 | 129 | 1007    | 2738 | 1829 | 7.83 x 10 <sup>-6</sup> | T      | C |
| rs925864   | 2   | 21451176  | LOC100287183 | 133595      | 312  | 190 | 29  | 3759    | 1649 | 171  | 8.72 x 10 <sup>-6</sup> | A      | G |
| rs16975754 | 15  | 96419749  | LOC100507311 | 276895      | 25   | 192 | 314 | 178     | 1574 | 3821 | 9.39 x 10 <sup>-6</sup> | A      | G |
| rs11687850 | 2   | 21394682  | APOB         | -127737     | 21   | 174 | 336 | 127     | 1440 | 4009 | 9.96 x 10 <sup>-6</sup> | T      | C |
| rs10826553 | 10  | 29300987  | RPL21P93     | -112534     | 124  | 278 | 129 | 1004    | 2741 | 1836 | 1.06 x 10 <sup>-5</sup> | A      | G |
| rs11599857 | 10  | 29306940  | RPL21P93     | -118487     | 129  | 278 | 124 | 1835    | 2739 | 1005 | 1.11 x 10 <sup>-5</sup> | T      | C |
| rs11637142 | 15  | 85295927  | ZNF592       | 0           | 390  | 132 | 9   | 4530    | 995  | 53   | 1.19 x 10 <sup>-5</sup> | A      | G |
| rs249299   | 16  | 9470037   | RPL21P119    | -219259     | 46   | 228 | 257 | 337     | 2009 | 3234 | 1.20 x 10 <sup>-5</sup> | A      | C |
| rs1773877  | 10  | 29302946  | RPL21P93     | -114493     | 90   | 265 | 176 | 1329    | 2800 | 1452 | 1.25 x 10 <sup>-5</sup> | A      | G |
| rs212282   | 4   | 111986708 | LOC391686    | -119723     | 196  | 252 | 83  | 2518    | 2441 | 602  | 1.44 x 10 <sup>-5</sup> | A      | G |
| rs10466058 | 10  | 29312679  | RPL21P93     | -124226     | 128  | 276 | 127 | 1802    | 2736 | 1025 | 1.45 x 10 <sup>-5</sup> | A      | G |
| rs4711253  | 6   | 31007081  | MUC22        | 3902        | 33   | 216 | 282 | 257     | 1810 | 3514 | 1.47 x 10 <sup>-5</sup> | A      | C |
| rs11637505 | 15  | 87636301  | AGBL1        | 64018       | 17   | 193 | 320 | 164     | 1473 | 3925 | 1.47 x 10 <sup>-5</sup> | T      | C |
| rs4812591  | 20  | 40990426  | PTPRT        | 0           | 170  | 247 | 113 | 2196    | 2552 | 831  | 1.56 x 10 <sup>-5</sup> | A      | G |
| rs9469583  | 6   | 33717720  | IP6K3        | -3008       | 30   | 172 | 329 | 173     | 1503 | 3905 | 1.62 x 10 <sup>-5</sup> | T      | C |
| rs16937767 | 8   | 49457532  | RPL29P19     | 159780      | 48   | 216 | 267 | 313     | 1991 | 3277 | 1.64 x 10 <sup>-5</sup> | T      | C |
| rs2891639  | 8   | 49441535  | RPL29P19     | 143783      | 53   | 216 | 262 | 335     | 2042 | 3199 | 1.68 x 10 <sup>-5</sup> | A      | G |
| rs2028973  | 6   | 25138627  | CMAHP        | -7          | 3    | 49  | 479 | 47      | 921  | 4613 | 1.71 x 10 <sup>-5</sup> | T      | C |
| rs8038822  | 15  | 54473080  | UNC13C       | 0           | 293  | 206 | 31  | 3600    | 1758 | 222  | 1.75 x 10 <sup>-5</sup> | A      | C |
| rs4924385  | 15  | 40037021  | FSIP1        | 0           | 119  | 278 | 134 | 1740    | 2704 | 1132 | 2.00 x 10 <sup>-5</sup> | A      | G |
| rs1193329  | 8   | 19153728  | SH2D4A       | -17353      | 222  | 239 | 70  | 2766    | 2339 | 473  | 2.12 x 10 <sup>-5</sup> | T      | C |
| rs97458    | 2   | 21327635  | APOB         | -60690      | 334  | 176 | 21  | 3971    | 1472 | 130  | 2.12 x 10 <sup>-5</sup> | A      | G |
| rs2071354  | 6   | 33044388  | HLA-DPA1     | 0           | 429  | 96  | 5   | 4039    | 1438 | 102  | 2.22 x 10 <sup>-5</sup> | T      | C |
| rs2512081  | 11  | 78819123  | ODZ1         | 0           | 148  | 258 | 125 | 1940    | 2694 | 947  | 2.26 x 10 <sup>-5</sup> | A      | G |
| rs34503701 | 6   | 30960221  | MUC21        | 2546        | 11   | 155 | 365 | 85      | 1187 | 4307 | 2.29 x 10 <sup>-5</sup> | A      | T |
| rs4280941  | 6   | 162250522 | PARK2        | 0           | 321  | 192 | 18  | 3893    | 1536 | 147  | 2.34 x 10 <sup>-5</sup> | T      | C |
| rs10056970 | 5   | 109405571 | LOC100289673 | 184371      | 37   | 218 | 276 | 665     | 2443 | 2450 | 2.44 x 10 <sup>-5</sup> | A      | G |
| rs950283   | 1   | 94567223  | ABCA4        | 0           | 172  | 266 | 93  | 2295    | 2550 | 735  | 2.52 x 10 <sup>-5</sup> | T      | C |
| rs4775587  | 15  | 63270157  | LOC100287243 | 0           | 78   | 245 | 208 | 555     | 2398 | 2625 | 2.63 x 10 <sup>-5</sup> | T      | C |
| rs10435421 | 7   | 136339058 | PSMC1P3      | -59515      | 359  | 148 | 24  | 4141    | 1324 | 103  | 2.67 x 10 <sup>-5</sup> | T      | C |
| rs2512043  | 8   | 98987918  | MATN2        | 0           | 71   | 250 | 210 | 1081    | 2700 | 1793 | 2.85 x 10 <sup>-5</sup> | A      | G |
| rs987870   | 6   | 33042880  | HLA-DPA1     | 0           | 429  | 97  | 5   | 4041    | 1436 | 104  | 2.89 x 10 <sup>-5</sup> | T      | C |
| rs16958932 | 16  | 69534636  | CYB5B        | 34469       | 246  | 231 | 54  | 3050    | 2158 | 372  | 2.90 x 10 <sup>-5</sup> | T      | C |
| rs1773879  | 10  | 29300299  | RPL21P93     | -111846     | 35   | 206 | 290 | 593     | 2414 | 2574 | 3.04 x 10 <sup>-5</sup> | T      | G |
| rs515135   | 2   | 21286057  | APOB         | -19112      | 8    | 143 | 380 | 65      | 1074 | 4442 | 3.31 x 10 <sup>-5</sup> | A      | G |
| rs11999408 | 9   | 28427729  | LINGO2       | 0           | 6    | 66  | 459 | 71      | 1146 | 4363 | 3.39 x 10 <sup>-5</sup> | A      | G |
| rs2512080  | 11  | 78818226  | ODZ1         | 0           | 148  | 260 | 123 | 1943    | 2691 | 946  | 3.43 x 10 <sup>-5</sup> | T      | C |
| rs2171582  | 17  | 3364303   | SPATA22      | 0           | 137  | 244 | 150 | 1745    | 2695 | 1134 | 3.49 x 10 <sup>-5</sup> | T      | C |
| rs1003576  | 20  | 41003699  | PTPRT        | 0           | 168  | 260 | 101 | 2242    | 2533 | 806  | 3.55 x 10 <sup>-5</sup> | T      | C |
| rs6796317  | 3   | 63927739  | ATXN7        | 0           | 372  | 144 | 15  | 4323    | 1176 | 82   | 3.63 x 10 <sup>-5</sup> | A      | G |
| rs6942045  | 6   | 33351696  | RPL35AP4     | 5437        | 19   | 150 | 362 | 278     | 2034 | 3268 | 3.68 x 10 <sup>-5</sup> | T      | C |
| rs936613   | 8   | 63530880  | NKAIN3       | 0           | 304  | 199 | 28  | 2740    | 2321 | 518  | 3.69 x 10 <sup>-5</sup> | A      | G |
| rs1480190  | 8   | 63581067  | NKAIN3       | 0           | 23   | 196 | 312 | 474     | 2255 | 2836 | 3.69 x 10 <sup>-5</sup> | T      | C |
| rs9388539  | 6   | 127230163 | RSPO3        | -209885     | 232  | 237 | 62  | 2913    | 2213 | 454  | 3.71 x 10 <sup>-5</sup> | T      | C |
| rs863002   | 1   | 159174920 | DARC         | 0           | 16   | 118 | 397 | 53      | 1018 | 4508 | 3.81 x 10 <sup>-5</sup> | A      | G |
| rs6566535  | 18  | 69110583  | LOC100505776 | 76617       | 43   | 183 | 304 | 214     | 1805 | 3553 | 3.89 x 10 <sup>-5</sup> | A      | C |
| rs11634320 | 15  | 85172183  | SCAND2       | -2508       | 8    | 128 | 395 | 56      | 959  | 4566 | 3.91 x 10 <sup>-5</sup> | A      | C |
| rs11638290 | 15  | 85227636  | SEC11A       | 0           | 11   | 135 | 385 | 59      | 1071 | 4444 | 3.98 x 10 <sup>-5</sup> | A      | G |
| rs3937008  | 18  | 32618893  | MAPRE2       | 0           | 55   | 243 | 233 | 908     | 2616 | 2053 | 4.00 x 10 <sup>-5</sup> | T      | G |
| rs2569217  | 5   | 171860077 | SH3PXD2B     | 0           | 218  | 249 | 64  | 2818    | 2233 | 520  | 4.06 x 10 <sup>-5</sup> | A      | G |
| rs2925076  | 5   | 109415961 | LOC100289673 | 194761      | 271  | 222 | 37  | 2430    | 2453 | 674  | 4.15 x 10 <sup>-5</sup> | T      | C |
| rs10734961 | 12  | 129068616 | TMEM132C     | 0           | 106  | 249 | 176 | 798     | 2520 | 2253 | 4.23 x 10 <sup>-5</sup> | A      | G |
| rs1257282  | 14  | 99828776  | SETD3        | 35307       | 1    | 50  | 480 | 2       | 298  | 5279 | 4.29 x 10 <sup>-5</sup> | A      | G |
| rs606699   | 6   | 10358695  | LOC442161    | 7049        | 455  | 72  | 4   | 5069    | 491  | 15   | 4.36 x 10 <sup>-5</sup> | A      | G |
| rs884174   | 18  | 45821931  | C18orf12     | 42723       | 324  | 184 | 23  | 3851    | 1588 | 141  | 4.42 x 10 <sup>-5</sup> | A      | C |
| rs6134687  | 20  | 12830779  | LOC100505515 | -100309     | 2    | 97  | 432 | 21      | 659  | 4900 | 4.53 x 10 <sup>-5</sup> | A      | C |
| rs17751112 | 15  | 63270333  | LOC100287243 | 0           | 73   | 238 | 220 | 504     | 2354 | 2723 | 4.62 x 10 <sup>-5</sup> | T      | C |
| rs7251736  | 19  | 45618902  | LRRC68       | 0           | 371  | 144 | 16  | 4308    | 1182 | 90   | 4.63 x 10 <sup>-5</sup> | A      | G |
| rs755228   | 10  | 76829374  | DUPD1        | -11102      | 136  | 278 | 117 | 1898    | 2706 | 977  | 4.63 x 10 <sup>-5</sup> | T      | C |
| rs10765734 | 11  | 95090828  | LOC100129203 | 123260      | 290  | 202 | 39  | 2554    | 2426 | 600  | 4.74 x 10 <sup>-5</sup> | T      | C |
| rs3803403  | 15  | 85383145  | ALPK3        | 0           | 391  | 127 | 10  | 4522    | 1004 | 53   | 4.77 x 10 <sup>-5</sup> | C      | G |
| rs863006   | 1   | 159177748 | DARC         | 1458        | 16   | 118 | 397 | 54      | 1021 | 4504 | 4.82 x 10 <sup>-5</sup> | A      | G |
| rs1051168  | 15  | 85200520  | NMB          | 0           | 9    | 131 | 391 | 59      | 1001 | 4512 | 4.84 x 10 <sup>-5</sup> | A      | C |
| rs11877772 | 18  | 39396802  | LOC100301521 | -2109       | 227  | 244 | 59  | 1997    | 2636 | 948  | 4.93 x 10 <sup>-5</sup> | T      | G |
| rs9962989  | 18  | 69133367  | LOC100505776 | 53833       | 348  | 149 | 34  | 3946    | 1513 | 117  | 4.94 x 10 <sup>-5</sup> | A      | G |

We analyzed 539 bladder cancer cases and 5594 controls at GWAS stage. Chr., chromosome; Position in the NCBI Build 36.3. \*P values were obtained from Cochran-Armitage trend test.

Supplementary Table 3. Result of replication analyses

| SNP        | case |     |     | control |      |      | <sup>a</sup> P <sub>trend</sub> | <sup>b</sup> OR (95% C.I.) |
|------------|------|-----|-----|---------|------|------|---------------------------------|----------------------------|
|            | 11   | 12  | 22  | 11      | 12   | 22   |                                 |                            |
| rs6933607  | 7    | 119 | 466 | 91      | 1477 | 5396 | 0.49                            | 1.07 (0.89-1.29)           |
| rs3828783  | 6    | 113 | 473 | 81      | 1370 | 5512 | 0.64                            | 1.05 (0.86-1.27)           |
| rs942636   | 8    | 101 | 482 | 68      | 1241 | 5651 | 0.99                            | 1.00 (0.82-1.22)           |
| rs1416476  | 0    | 20  | 572 | 4       | 244  | 6716 | 0.77                            | 1.07 (0.68-1.7)            |
| rs2092449  | 23   | 187 | 382 | 208     | 1993 | 4755 | 0.040                           | 0.85 (0.74-0.99)           |
| rs2296329  | 421  | 139 | 19  | 4915    | 1859 | 187  | 0.50                            | 0.94 (0.8-1.12)            |
| rs961266   | 500  | 85  | 7   | 5879    | 1034 | 44   | 0.72                            | 1.04 (0.84-1.29)           |
| rs334446   | 379  | 190 | 21  | 4490    | 2196 | 275  | 0.96                            | 1.00 (0.86-1.16)           |
| rs16972486 | 15   | 165 | 412 | 280     | 2228 | 4453 | 0.0032                          | 1.27 (1.08-1.49)           |
| rs11543198 | 21   | 158 | 413 | 316     | 2382 | 4265 | 1.22 x 10 <sup>-4</sup>         | 1.36 (1.16-1.59)           |
| rs1763382  | 132  | 289 | 171 | 1692    | 3449 | 1822 | 0.12                            | 1.10 (0.98-1.24)           |
| rs2257127  | 449  | 125 | 17  | 5174    | 1643 | 147  | 0.67                            | 0.96 (0.81-1.14)           |
| rs7081804  | 126  | 271 | 179 | 1311    | 3348 | 2305 | 0.10                            | 0.90 (0.8-1.02)            |
| rs925864   | 398  | 175 | 19  | 4627    | 2122 | 215  | 0.77                            | 0.98 (0.84-1.14)           |
| rs16975754 | 8    | 214 | 370 | 220     | 1982 | 4733 | 0.09                            | 0.88 (0.75-1.02)           |
| rs11687850 | 14   | 149 | 429 | 145     | 1793 | 5024 | 0.99                            | 1.00 (0.85-1.18)           |
| rs11637142 | 479  | 105 | 8   | 5633    | 1248 | 77   | 0.87                            | 1.02 (0.84-1.24)           |
| rs249299   | 54   | 210 | 327 | 388     | 2606 | 3969 | 0.044                           | 0.87 (0.76-1)              |
| rs4711253  | 32   | 195 | 364 | 361     | 2419 | 4183 | 0.61                            | 1.04 (0.9-1.2)             |
| rs4812591  | 242  | 259 | 90  | 2637    | 3270 | 1057 | 0.31                            | 0.94 (0.83-1.06)           |
| rs9469583  | 20   | 188 | 383 | 198     | 1878 | 4884 | 0.009                           | 0.82 (0.7-0.95)            |
| rs16937767 | 34   | 221 | 337 | 384     | 2487 | 4093 | 0.42                            | 0.94 (0.82-1.08)           |
| rs2891639  | 37   | 223 | 332 | 400     | 2564 | 3992 | 0.48                            | 0.95 (0.83-1.09)           |
| rs2028973  | 3    | 80  | 507 | 77      | 1161 | 5726 | 0.02                            | 1.33 (1.06-1.66)           |
| rs4924385  | 159  | 298 | 134 | 2058    | 3435 | 1468 | 0.16                            | 1.09 (0.97-1.23)           |
| rs1193329  | 308  | 237 | 46  | 3427    | 2933 | 602  | 0.17                            | 0.91 (0.8-1.04)            |
| rs2071354  | 461  | 121 | 9   | 5347    | 1511 | 103  | 0.56                            | 0.95 (0.79-1.14)           |
| rs2512081  | 214  | 277 | 101 | 2507    | 3266 | 1188 | 0.96                            | 1.00 (0.88-1.13)           |
| rs34503701 | 18   | 114 | 459 | 141     | 1616 | 5206 | 0.37                            | 1.09 (0.91-1.3)            |
| rs4280941  | 394  | 183 | 15  | 4858    | 1939 | 167  | 0.13                            | 1.12 (0.96-1.31)           |
| rs950283   | 242  | 254 | 95  | 2915    | 3128 | 921  | 0.20                            | 1.08 (0.96-1.23)           |
| rs4775587  | 50   | 256 | 285 | 763     | 3053 | 3148 | 0.053                           | 1.14 (1-1.29)              |
| rs10435421 | 421  | 162 | 8   | 5128    | 1666 | 155  | 0.43                            | 1.07 (0.91-1.26)           |
| rs2512043  | 112  | 285 | 195 | 1240    | 3413 | 2306 | 0.66                            | 0.97 (0.86-1.1)            |
| rs16958932 | 305  | 233 | 53  | 3731    | 2714 | 519  | 0.20                            | 1.09 (0.96-1.24)           |
| rs1773879  | 57   | 233 | 301 | 753     | 3029 | 3181 | 0.024                           | 1.16 (1.02-1.32)           |
| rs11999408 | 14   | 119 | 456 | 110     | 1314 | 5538 | 0.13                            | 0.87 (0.72-1.04)           |
| rs2171582  | 180  | 283 | 128 | 2113    | 3351 | 1474 | 0.89                            | 1.01 (0.89-1.14)           |
| rs6796317  | 442  | 139 | 11  | 5424    | 1437 | 99   | 0.06                            | 1.18 (0.99-1.41)           |
| rs6942045  | 26   | 195 | 371 | 321     | 2446 | 4190 | 0.28                            | 1.08 (0.94-1.25)           |
| rs936613   | 298  | 248 | 46  | 3496    | 2875 | 593  | 0.75                            | 0.98 (0.86-1.12)           |
| rs1480190  | 42   | 238 | 312 | 541     | 2784 | 3633 | 0.67                            | 1.03 (0.9-1.18)            |
| rs9388539  | 307  | 235 | 49  | 3562    | 2844 | 557  | 0.86                            | 0.99 (0.87-1.13)           |
| rs863002   | 6    | 109 | 477 | 79      | 1266 | 5619 | 1.00                            | 1.00 (0.82-1.22)           |
| rs6566535  | 22   | 204 | 363 | 298     | 2396 | 4267 | 0.72                            | 1.03 (0.89-1.19)           |
| rs11634320 | 7    | 105 | 479 | 79      | 1200 | 5685 | 0.73                            | 0.97 (0.79-1.18)           |
| rs11638290 | 9    | 111 | 472 | 90      | 1338 | 5531 | 0.99                            | 1.00 (0.83-1.21)           |
| rs3937008  | 104  | 263 | 223 | 1103    | 3290 | 2560 | 0.79                            | 0.98 (0.87-1.11)           |
| rs10734961 | 90   | 275 | 226 | 989     | 3266 | 2693 | 0.61                            | 0.97 (0.86-1.09)           |
| rs1257282  | 0    | 29  | 561 | 7       | 383  | 6574 | 0.44                            | 1.16 (0.79-1.71)           |
| rs606699   | 529  | 60  | 3   | 6293    | 652  | 15   | 0.30                            | 1.15 (0.88-1.49)           |
| rs884174   | 404  | 168 | 19  | 4733    | 2027 | 198  | 0.99                            | 1.00 (0.86-1.17)           |
| rs6134687  | 2    | 85  | 504 | 35      | 888  | 6038 | 0.40                            | 0.91 (0.72-1.14)           |
| rs7251736  | 441  | 141 | 10  | 5291    | 1560 | 113  | 0.44                            | 1.07 (0.9-1.27)            |
| rs755228   | 191  | 290 | 109 | 2401    | 3400 | 1163 | 0.19                            | 1.08 (0.96-1.22)           |
| rs10765734 | 276  | 239 | 77  | 3225    | 3018 | 721  | 0.41                            | 1.05 (0.93-1.2)            |
| exm1184743 | 465  | 103 | 7   | 5630    | 1254 | 79   | 0.97                            | 1.00 (0.82-1.22)           |
| rs1051168  | 8    | 104 | 478 | 81      | 1260 | 5612 | 0.95                            | 1.01 (0.83-1.22)           |
| rs11877772 | 208  | 289 | 95  | 2449    | 3400 | 1114 | 0.98                            | 1.00 (0.89-1.13)           |

We analyzed 592 bladder cancer cases and 6,964 controls at replication stage. <sup>a</sup>P values were obtained from Cochran-Armitage trend test. <sup>b</sup>Odd ratio with 95% confidence interval was shown using allele 1 as a reference.

**Supplementary Table 4. Replication analysis in Europeans**

| <b>GWAS in Japanese, n=6112</b>                       |                        |                           |                   |                         |
|-------------------------------------------------------|------------------------|---------------------------|-------------------|-------------------------|
| rs8041357                                             | cases, n (%)<br>N=531  | controls, n (%)<br>N=5581 | OR (95% CI)       | <sup>a</sup> P-value    |
| G                                                     | 172 (16.2)             | 2478 (22.2)               | referent          |                         |
| A                                                     | 890 (83.8)             | 8684 (77.8)               | 1.48 (1.25-1.75)  | 6.41 x 10 <sup>-6</sup> |
| GG                                                    | 16 (3.01)              | 283 (5.07)                | referent          |                         |
| AG                                                    | 140 (26.4)             | 1912 (34.3)               |                   |                         |
| AA                                                    | 375 (70.6)             | 3386 (60.7)               | 1.56 (1.28-1.89)  | 6.67 x 10 <sup>-6</sup> |
| <b>Replication 2 - NCI GWAS1 in Europeans, n=8609</b> |                        |                           |                   |                         |
| rs8041357                                             | cases, n (%)<br>N=3508 | controls, n (%)<br>N=5101 | OR (95% CI)       | <sup>a,b</sup> P-value  |
| G                                                     | 219 (3.12)             | 380 (3.72)                | referent          |                         |
| A                                                     | 6797 (96.88)           | 9822 (96.28)              | 1.19 (1.004-1.42) | 0.045                   |
| GG                                                    | 8 (0.23)               | 6 (0.12)                  | referent          |                         |
| AG                                                    | 203 (5.79)             | 368 (7.21)                |                   |                         |
| AA                                                    | 3297 (93.99)           | 4727 (92.67)              | 1.23 (1.03-1.47)  | 0.025                   |

<sup>a</sup> P-values for an additive and recessive models. <sup>b</sup> Adjusted for age, sex, study center, smoking (ever/never) and significant EVs.

Supplementary Table 5. Imputation analysis of 15q24 locu

| SNP         | CHR | POS      | Allele<br>Risk/Non risk | Risk allele freq |        | Rsqr   | OR   | P-VALUE                 | gene      | relative loc |
|-------------|-----|----------|-------------------------|------------------|--------|--------|------|-------------------------|-----------|--------------|
|             |     |          |                         | Case             | Cont.  |        |      |                         |           |              |
| rs59797898  | 15  | 74716080 | T/C                     | 0.8257           | 0.7689 | 0.897  | 1.48 | 1.03 x 10 <sup>-5</sup> | SEMA7A    | 0            |
| rs7174305   | 15  | 74728998 | C/G                     | 0.8237           | 0.7644 | 0.8938 | 1.50 | 4.63 x 10 <sup>-6</sup> | SEMA7A    | -2699        |
| rs80343857  | 15  | 74750946 | T/C                     | 0.8384           | 0.7804 | 0.9041 | 1.51 | 5.13x 10 <sup>-6</sup>  | UBL7      | 0            |
| rs12442548  | 15  | 74764791 | A/G                     | 0.8379           | 0.7807 | 0.8855 | 1.52 | 5.37 x 10 <sup>-6</sup> | LOC440288 | 0            |
| rs189260882 | 15  | 74795830 | C/T                     | 0.9069           | 0.8714 | 0.638  | 1.78 | 3.61 x 10 <sup>-5</sup> | LOC440288 | 22197        |
| rs78706301  | 15  | 74808869 | C/A                     | 0.8266           | 0.7706 | 0.8296 | 1.53 | 5.66 x 10 <sup>-6</sup> | ARID3B    | -24679       |
| rs12437988  | 15  | 74829821 | C/T                     | 0.8372           | 0.7779 | 0.9627 | 1.49 | 6.50 x 10 <sup>-6</sup> | ARID3B    | -3727        |
| rs8041357   | 15  | 74869438 | T/C                     | 0.838            | 0.7779 | 0.9997 | 1.47 | 6.41 x 10 <sup>-6</sup> | ARID3B    | 0            |
| rs12443108  | 15  | 74895827 | A/G                     | 0.8249           | 0.7626 | 0.949  | 1.49 | 3.17 x 10 <sup>-6</sup> | CLK3      | -4886        |
| rs11543198  | 15  | 74912328 | G/A                     | 0.838            | 0.7779 | 1      | 1.47 | 6.22 x 10 <sup>-6</sup> | CLK3      | 0            |
| rs75388839  | 15  | 74930402 | A/G                     | 0.8258           | 0.7667 | 0.9679 | 1.46 | 1.06 x 10 <sup>-5</sup> | EDC3      | 0            |
| rs1048943   | 15  | 75012985 | T/C                     | 0.8323           | 0.7702 | 0.9997 | 1.48 | 4.09 x 10 <sup>-6</sup> | CYP1A1    | 0            |
| rs17861110  | 15  | 75022463 | C/G                     | 0.8321           | 0.7696 | 0.9762 | 1.49 | 3.13 x 10 <sup>-6</sup> | CYP1A1    | -4586        |
| rs17861115  | 15  | 75025332 | C/T                     | 0.8416           | 0.7808 | 0.9111 | 1.54 | 1.89 x 10 <sup>-6</sup> | CYP1A1    | -7455        |
| rs149798731 | 15  | 75030331 | C/T                     | 0.846            | 0.7915 | 0.7724 | 1.61 | 2.37 x 10 <sup>-6</sup> | CYP1A2    | -10853       |
| rs16972208  | 15  | 75032587 | G/A                     | 0.8256           | 0.7612 | 0.9356 | 1.53 | 1.24 x 10 <sup>-6</sup> | CYP1A2    | -8597        |
| rs17861140  | 15  | 75034922 | G/A                     | 0.8251           | 0.7612 | 0.9371 | 1.52 | 1.56 x 10 <sup>-6</sup> | CYP1A2    | -6262        |
| rs2069514   | 15  | 75038220 | G/A                     | 0.8256           | 0.7615 | 0.9397 | 1.52 | 1.42 x 10 <sup>-6</sup> | CYP1A2    | -2964        |
| rs1350194   | 15  | 75052062 | A/T                     | 0.8312           | 0.7648 | 0.9521 | 1.55 | 5.80 x 10 <sup>-7</sup> | CYP1A2    | 3121         |
| rs61620875  | 15  | 75052233 | C/T                     | 0.8312           | 0.7648 | 0.9523 | 1.55 | 5.81 x 10 <sup>-7</sup> | CYP1A2    | 3292         |
| rs117429208 | 15  | 75058402 | C/T                     | 0.8482           | 0.7876 | 0.9812 | 1.51 | 3.73 x 10 <sup>-6</sup> | CYP1A2    | 9461         |
| rs4488423   | 15  | 75059387 | T/G                     | 0.8483           | 0.7877 | 0.9815 | 1.51 | 3.82 x 10 <sup>-6</sup> | CYP1A2    | 10446        |
| rs12437562  | 15  | 75060346 | C/G                     | 0.8487           | 0.7887 | 0.9861 | 1.50 | 4.71 x 10 <sup>-6</sup> | CYP1A2    | 11405        |
| rs16972381  | 15  | 75061524 | G/A                     | 0.8488           | 0.7889 | 0.9877 | 1.50 | 4.99 x 10 <sup>-6</sup> | CYP1A2    | 12583        |
| rs59567621  | 15  | 75062405 | T/C                     | 0.8489           | 0.7891 | 0.9892 | 1.50 | 5.25 x 10 <sup>-6</sup> | CSK       | -12020       |
| rs58322828  | 15  | 75063742 | A/G                     | 0.8542           | 0.7961 | 0.9739 | 1.51 | 6.24 x 10 <sup>-6</sup> | CSK       | -10683       |
| rs16972486  | 15  | 75066008 | C/T                     | 0.851            | 0.7921 | 0.9984 | 1.49 | 5.80 x 10 <sup>-6</sup> | CSK       | -8417        |
| rs56992651  | 15  | 75067012 | C/T                     | 0.8511           | 0.7922 | 0.9968 | 1.49 | 6.85 x 10 <sup>-6</sup> | CSK       | -7413        |
| rs58050869  | 15  | 75067625 | C/T                     | 0.8511           | 0.7922 | 0.9965 | 1.49 | 6.85 x 10 <sup>-6</sup> | CSK       | -6800        |
| rs77979355  | 15  | 75070518 | G/A                     | 0.8413           | 0.7797 | 0.979  | 1.50 | 3.73 x 10 <sup>-6</sup> | CSK       | -3907        |

We analyzed 539 bladder cancer cases and 5581 controls at GWAS stage. Chr.,chromosome; Position in the NCBI Build 37. <sup>a</sup>P values were obtained from allele dosage test.
